# Supplementary material
Source: PubMed Central journal article supplement (PMC7012488)
Supplement: 2019_239624-Disclosure.pdf [file 2019_239624-Disclosure.pdf]

Haematologica  
HAEMATOL/2019/239624  
Version 1

Is unrelated donor or haploidentical hematopoietic transplantation  
preferred for patients with AML in remission?

Richard Champlin

Disclosures: Nothing to disclose.
